# Supplementary material for: Integrative multiomics evaluation reveals the importance of pseudouridine synthases in hepatocellular carcinoma
Source: Front Genet. 2022 Nov 10;13:944681. doi: 10.3389/fgene.2022.944681 (PMC9686406; doi:10.3389/fgene.2022.944681)
Supplement: Supplementary file 20 [file Table8.XLSX]

## Sheet: TCGA-LIHC
Table S8A Univariate Cox analysis of KEGG pathways for OS in TCGA-LIHC
KEGG pathways	HR	HR.95L	HR.95H	pvalue
KEGG_N_GLYCAN_BIOSYNTHESIS	2.24901	1.24004	4.07893	0.00762475
KEGG_OTHER_GLYCAN_DEGRADATION	1.60343	0.925111	2.7791	0.0924598
KEGG_O_GLYCAN_BIOSYNTHESIS	0.892658	0.442542	1.80059	0.751105
KEGG_GLYCOSAMINOGLYCAN_DEGRADATION	1.37084	0.726353	2.58716	0.330379
KEGG_GLYCOSAMINOGLYCAN_BIOSYNTHESIS_KERATAN_SULFATE	2.37604	1.17672	4.79768	0.0157844
KEGG_GLYCEROLIPID_METABOLISM	0.707486	0.263867	1.89693	0.491668
KEGG_GLYCOSYLPHOSPHATIDYLINOSITOL_GPI_ANCHOR_BIOSYNTHESIS	1.89418	1.09509	3.27638	0.0223209
KEGG_GLYCEROPHOSPHOLIPID_METABOLISM	1.54303	0.53397	4.45893	0.423057
KEGG_ETHER_LIPID_METABOLISM	0.717291	0.290666	1.7701	0.470937
KEGG_ARACHIDONIC_ACID_METABOLISM	0.313703	0.127409	0.772392	0.0116775
KEGG_LINOLEIC_ACID_METABOLISM	0.222562	0.11236	0.440848	1.64246e-05
KEGG_ALPHA_LINOLENIC_ACID_METABOLISM	0.21853	0.0963673	0.495557	0.000271995
KEGG_SPHINGOLIPID_METABOLISM	1.9289	0.927312	4.01229	0.0787448
KEGG_GLYCOSPHINGOLIPID_BIOSYNTHESIS_LACTO_AND_NEOLACTO_SERIES	2.05305	0.898379	4.69181	0.0880388
KEGG_GLYCOSPHINGOLIPID_BIOSYNTHESIS_GLOBO_SERIES	1.99003	1.0833	3.65572	0.0265672
KEGG_GLYCOSPHINGOLIPID_BIOSYNTHESIS_GANGLIO_SERIES	1.66656	0.894234	3.10591	0.107831
KEGG_RIBOFLAVIN_METABOLISM	2.60645	1.41977	4.78499	0.00199632
KEGG_NICOTINATE_AND_NICOTINAMIDE_METABOLISM	0.717462	0.326054	1.57873	0.409275
KEGG_PANTOTHENATE_AND_COA_BIOSYNTHESIS	0.79305	0.391764	1.60538	0.519311
KEGG_AMINOACYL_TRNA_BIOSYNTHESIS	2.17847	1.29296	3.67043	0.00344182
KEGG_BASAL_TRANSCRIPTION_FACTORS	1.96776	1.08018	3.58465	0.0269651
KEGG_NON_HOMOLOGOUS_END_JOINING	1.88885	1.17265	3.04247	0.00892843
KEGG_SNARE_INTERACTIONS_IN_VESICULAR_TRANSPORT	1.92685	0.982522	3.7788	0.0563068
KEGG_LYSOSOME	2.96581	1.46971	5.98484	0.00240584
KEGG_CARDIAC_MUSCLE_CONTRACTION	0.873178	0.425241	1.79296	0.711804
KEGG_RENIN_ANGIOTENSIN_SYSTEM	0.404818	0.199483	0.821512	0.0122638
KEGG_CIRCADIAN_RHYTHM_MAMMAL	0.90211	0.570852	1.42559	0.65904
KEGG_TASTE_TRANSDUCTION	0.723214	0.261061	2.00351	0.533078
KEGG_PROXIMAL_TUBULE_BICARBONATE_RECLAMATION	0.303837	0.137263	0.672557	0.00329919
KEGG_PATHOGENIC_ESCHERICHIA_COLI_INFECTION	2.27715	1.20981	4.28613	0.0107661
KEGG_SYSTEMIC_LUPUS_ERYTHEMATOSUS	0.796655	0.365151	1.73807	0.567894
KEGG_PRIMARY_IMMUNODEFICIENCY	0.731081	0.473245	1.12939	0.158066
KEGG_HYPERTROPHIC_CARDIOMYOPATHY_HCM	0.916755	0.466988	1.7997	0.80062
KEGG_ARRHYTHMOGENIC_RIGHT_VENTRICULAR_CARDIOMYOPATHY_ARVC	0.994962	0.512232	1.93262	0.988105
KEGG_DILATED_CARDIOMYOPATHY	0.797642	0.419058	1.51825	0.491153
KEGG_GLYCOLYSIS_GLUCONEOGENESIS	0.860068	0.399651	1.85091	0.699869
KEGG_CITRATE_CYCLE_TCA_CYCLE	0.773818	0.47887	1.25043	0.294995
KEGG_PENTOSE_PHOSPHATE_PATHWAY	2.45781	1.20548	5.01116	0.0133569
KEGG_PENTOSE_AND_GLUCURONATE_INTERCONVERSIONS	0.90614	0.532979	1.54057	0.715862
KEGG_FRUCTOSE_AND_MANNOSE_METABOLISM	3.48541	1.43864	8.4441	0.00568287
KEGG_GALACTOSE_METABOLISM	1.14449	0.511329	2.56169	0.742676
KEGG_ASCORBATE_AND_ALDARATE_METABOLISM	0.767133	0.479876	1.22634	0.268064
KEGG_FATTY_ACID_METABOLISM	0.458473	0.292444	0.71876	0.000675192
KEGG_STEROID_BIOSYNTHESIS	1.1501	0.745018	1.77545	0.527851
KEGG_PRIMARY_BILE_ACID_BIOSYNTHESIS	0.569132	0.385302	0.840668	0.00462577
KEGG_STEROID_HORMONE_BIOSYNTHESIS	0.60086	0.332714	1.08511	0.0911988
KEGG_OXIDATIVE_PHOSPHORYLATION	1.15388	0.668105	1.99284	0.607696
KEGG_PURINE_METABOLISM	7.34657	2.5361	21.2815	0.000237959
KEGG_PYRIMIDINE_METABOLISM	6.54713	2.7711	15.4685	1.84025e-05
KEGG_ALANINE_ASPARTATE_AND_GLUTAMATE_METABOLISM	0.384656	0.195958	0.75506	0.00549589
KEGG_GLYCINE_SERINE_AND_THREONINE_METABOLISM	0.451801	0.283661	0.719604	0.000821213
KEGG_CYSTEINE_AND_METHIONINE_METABOLISM	0.873702	0.413263	1.84714	0.723736
KEGG_VALINE_LEUCINE_AND_ISOLEUCINE_DEGRADATION	0.523757	0.341575	0.803107	0.00302357
KEGG_VALINE_LEUCINE_AND_ISOLEUCINE_BIOSYNTHESIS	1.65246	1.02028	2.67635	0.0411939
KEGG_LYSINE_DEGRADATION	0.739798	0.422225	1.29623	0.292236
KEGG_ARGININE_AND_PROLINE_METABOLISM	0.43557	0.220422	0.860715	0.0167759
KEGG_HISTIDINE_METABOLISM	0.332097	0.1788	0.616825	0.000484011
KEGG_TYROSINE_METABOLISM	0.331343	0.172296	0.637208	0.000930766
KEGG_PHENYLALANINE_METABOLISM	0.438425	0.240379	0.799642	0.00716308
KEGG_TRYPTOPHAN_METABOLISM	0.447192	0.256825	0.778667	0.00445395
KEGG_BETA_ALANINE_METABOLISM	0.570472	0.354326	0.918471	0.0208902
KEGG_TAURINE_AND_HYPOTAURINE_METABOLISM	0.391653	0.194785	0.787492	0.00853002
KEGG_SELENOAMINO_ACID_METABOLISM	1.22824	0.612693	2.46222	0.562337
KEGG_GLUTATHIONE_METABOLISM	1.6173	0.749198	3.49128	0.220762
KEGG_STARCH_AND_SUCROSE_METABOLISM	0.635949	0.321632	1.25744	0.193136
KEGG_AMINO_SUGAR_AND_NUCLEOTIDE_SUGAR_METABOLISM	2.61906	1.28078	5.35569	0.0083396
KEGG_GLYCOSAMINOGLYCAN_BIOSYNTHESIS_CHONDROITIN_SULFATE	1.10953	0.628674	1.95817	0.719898
KEGG_GLYCOSAMINOGLYCAN_BIOSYNTHESIS_HEPARAN_SULFATE	1.63865	0.782858	3.42998	0.190055
KEGG_INOSITOL_PHOSPHATE_METABOLISM	1.34808	0.758953	2.3945	0.308212
KEGG_PYRUVATE_METABOLISM	0.783126	0.413021	1.48488	0.453923
KEGG_GLYOXYLATE_AND_DICARBOXYLATE_METABOLISM	0.791784	0.429556	1.45946	0.454305
KEGG_PROPANOATE_METABOLISM	0.583878	0.365279	0.933296	0.0245485
KEGG_BUTANOATE_METABOLISM	0.509799	0.30848	0.842503	0.00857382
KEGG_ONE_CARBON_POOL_BY_FOLATE	0.835194	0.427453	1.63188	0.598218
KEGG_FOLATE_BIOSYNTHESIS	0.761645	0.430809	1.34654	0.348999
KEGG_RETINOL_METABOLISM	0.477212	0.278596	0.817422	0.00705719
KEGG_PORPHYRIN_AND_CHLOROPHYLL_METABOLISM	0.996595	0.532771	1.86422	0.991483
KEGG_TERPENOID_BACKBONE_BIOSYNTHESIS	1.18011	0.73795	1.88721	0.489333
KEGG_LIMONENE_AND_PINENE_DEGRADATION	0.650799	0.435546	0.972435	0.0360483
KEGG_NITROGEN_METABOLISM	0.34733	0.171643	0.702846	0.00327719
KEGG_SULFUR_METABOLISM	0.708033	0.338501	1.48097	0.359147
KEGG_METABOLISM_OF_XENOBIOTICS_BY_CYTOCHROME_P450	0.501235	0.285997	0.878459	0.0158382
KEGG_DRUG_METABOLISM_CYTOCHROME_P450	0.410733	0.238389	0.707672	0.00134752
KEGG_DRUG_METABOLISM_OTHER_ENZYMES	0.67279	0.356871	1.26837	0.220542
KEGG_BIOSYNTHESIS_OF_UNSATURATED_FATTY_ACIDS	0.841562	0.483508	1.46477	0.541827
KEGG_ABC_TRANSPORTERS	0.603962	0.297062	1.22793	0.163676
KEGG_RIBOSOME	1.28148	0.934501	1.7573	0.123687
KEGG_RNA_DEGRADATION	2.64749	1.46206	4.79406	0.00130992
KEGG_RNA_POLYMERASE	4.1884	2.22627	7.87986	8.91302e-06
KEGG_DNA_REPLICATION	2.04356	1.34775	3.09861	0.000765047
KEGG_SPLICEOSOME	2.32587	1.42048	3.80834	0.000793424
KEGG_PROTEASOME	2.05423	1.2859	3.28167	0.00259497
KEGG_PROTEIN_EXPORT	2.21863	1.26327	3.8965	0.00554938
KEGG_PPAR_SIGNALING_PATHWAY	0.4221	0.225429	0.790352	0.00703571
KEGG_BASE_EXCISION_REPAIR	2.51071	1.43093	4.40529	0.00133164
KEGG_NUCLEOTIDE_EXCISION_REPAIR	2.26401	1.32017	3.88264	0.00298513
KEGG_MISMATCH_REPAIR	1.69991	1.08438	2.66484	0.0207164
KEGG_HOMOLOGOUS_RECOMBINATION	2.26379	1.40109	3.65768	0.00084492
KEGG_MAPK_SIGNALING_PATHWAY	1.08872	0.496702	2.38637	0.831873
KEGG_ERBB_SIGNALING_PATHWAY	1.35638	0.702235	2.61987	0.364125
KEGG_CALCIUM_SIGNALING_PATHWAY	0.434139	0.180201	1.04593	0.0629033
KEGG_CYTOKINE_CYTOKINE_RECEPTOR_INTERACTION	0.599637	0.310929	1.15642	0.126946
KEGG_CHEMOKINE_SIGNALING_PATHWAY	0.820381	0.436004	1.54362	0.539291
KEGG_PHOSPHATIDYLINOSITOL_SIGNALING_SYSTEM	1.13525	0.632611	2.03727	0.670696
KEGG_NEUROACTIVE_LIGAND_RECEPTOR_INTERACTION	0.239927	0.0839167	0.685979	0.00774081
KEGG_CELL_CYCLE	2.7497	1.57939	4.78719	0.000349451
KEGG_OOCYTE_MEIOSIS	2.87421	1.39531	5.9206	0.00419088
KEGG_P53_SIGNALING_PATHWAY	2.1749	0.98374	4.80836	0.0549254
KEGG_UBIQUITIN_MEDIATED_PROTEOLYSIS	1.92036	1.08443	3.40065	0.0252238
KEGG_REGULATION_OF_AUTOPHAGY	1.44853	0.580658	3.61355	0.426919
KEGG_ENDOCYTOSIS	1.58541	0.799361	3.14441	0.187167
KEGG_PEROXISOME	0.554395	0.320454	0.95912	0.0349264
KEGG_MTOR_SIGNALING_PATHWAY	1.3922	0.721485	2.68642	0.323839
KEGG_APOPTOSIS	1.15126	0.609952	2.17296	0.663847
KEGG_VASCULAR_SMOOTH_MUSCLE_CONTRACTION	0.555586	0.270355	1.14174	0.109762
KEGG_WNT_SIGNALING_PATHWAY	1.39174	0.678139	2.85627	0.367516
KEGG_DORSO_VENTRAL_AXIS_FORMATION	0.841289	0.509654	1.38872	0.499157
KEGG_NOTCH_SIGNALING_PATHWAY	1.32648	0.743894	2.36532	0.338366
KEGG_HEDGEHOG_SIGNALING_PATHWAY	0.93516	0.434864	2.01103	0.863751
KEGG_TGF_BETA_SIGNALING_PATHWAY	1.05589	0.549131	2.03032	0.870484
KEGG_AXON_GUIDANCE	1.1933	0.60576	2.35071	0.609437
KEGG_VEGF_SIGNALING_PATHWAY	1.06639	0.487869	2.33093	0.872009
KEGG_FOCAL_ADHESION	0.923083	0.494128	1.72442	0.801801
KEGG_ECM_RECEPTOR_INTERACTION	0.689206	0.378965	1.25343	0.222561
KEGG_CELL_ADHESION_MOLECULES_CAMS	0.504122	0.277172	0.9169	0.0248178
KEGG_ADHERENS_JUNCTION	1.29296	0.714407	2.34005	0.395953
KEGG_TIGHT_JUNCTION	1.05235	0.477371	2.31989	0.899318
KEGG_GAP_JUNCTION	1.25405	0.642116	2.44917	0.507417
KEGG_COMPLEMENT_AND_COAGULATION_CASCADES	0.412379	0.251116	0.677203	0.00046504
KEGG_ANTIGEN_PROCESSING_AND_PRESENTATION	0.892523	0.524793	1.51793	0.674742
KEGG_TOLL_LIKE_RECEPTOR_SIGNALING_PATHWAY	1.23437	0.643919	2.36625	0.525958
KEGG_NOD_LIKE_RECEPTOR_SIGNALING_PATHWAY	1.47887	0.840058	2.60346	0.175105
KEGG_RIG_I_LIKE_RECEPTOR_SIGNALING_PATHWAY	1.56868	0.751851	3.27292	0.230193
KEGG_CYTOSOLIC_DNA_SENSING_PATHWAY	1.67168	0.824001	3.3914	0.154556
KEGG_JAK_STAT_SIGNALING_PATHWAY	0.677322	0.335804	1.36617	0.276435
KEGG_HEMATOPOIETIC_CELL_LINEAGE	0.666699	0.376719	1.17989	0.163926
KEGG_NATURAL_KILLER_CELL_MEDIATED_CYTOTOXICITY	0.718507	0.375356	1.37537	0.318338
KEGG_T_CELL_RECEPTOR_SIGNALING_PATHWAY	0.899808	0.516923	1.5663	0.708918
KEGG_B_CELL_RECEPTOR_SIGNALING_PATHWAY	1.0191	0.573995	1.80937	0.948488
KEGG_FC_EPSILON_RI_SIGNALING_PATHWAY	0.838643	0.41037	1.71387	0.629412
KEGG_FC_GAMMA_R_MEDIATED_PHAGOCYTOSIS	1.34724	0.762715	2.37972	0.304511
KEGG_LEUKOCYTE_TRANSENDOTHELIAL_MIGRATION	0.848122	0.424099	1.69609	0.641317
KEGG_INTESTINAL_IMMUNE_NETWORK_FOR_IGA_PRODUCTION	0.76701	0.490274	1.19995	0.245369
KEGG_LONG_TERM_POTENTIATION	1.23012	0.602674	2.51079	0.569401
KEGG_NEUROTROPHIN_SIGNALING_PATHWAY	1.50469	0.808514	2.80032	0.197307
KEGG_LONG_TERM_DEPRESSION	0.929882	0.405429	2.13275	0.863716
KEGG_OLFACTORY_TRANSDUCTION	0.387825	0.133198	1.12921	0.0823685
KEGG_REGULATION_OF_ACTIN_CYTOSKELETON	1.40219	0.694381	2.83148	0.34581
KEGG_INSULIN_SIGNALING_PATHWAY	1.27664	0.575011	2.83439	0.548403
KEGG_GNRH_SIGNALING_PATHWAY	1.15909	0.570044	2.35682	0.683467
KEGG_PROGESTERONE_MEDIATED_OOCYTE_MATURATION	2.29866	1.16999	4.51612	0.0157093
KEGG_MELANOGENESIS	1.42192	0.645524	3.13212	0.382308
KEGG_ADIPOCYTOKINE_SIGNALING_PATHWAY	0.530984	0.243193	1.15934	0.112093
KEGG_TYPE_II_DIABETES_MELLITUS	0.59966	0.277205	1.29721	0.193947
KEGG_TYPE_I_DIABETES_MELLITUS	0.751819	0.494146	1.14386	0.182777
KEGG_MATURITY_ONSET_DIABETES_OF_THE_YOUNG	0.619191	0.315926	1.21357	0.162663
KEGG_ALDOSTERONE_REGULATED_SODIUM_REABSORPTION	0.448085	0.176626	1.13675	0.0910067
KEGG_VASOPRESSIN_REGULATED_WATER_REABSORPTION	1.56006	0.851617	2.85784	0.149891
KEGG_ALZHEIMERS_DISEASE	1.43544	0.687225	2.99825	0.336123
KEGG_PARKINSONS_DISEASE	1.08224	0.60969	1.92105	0.787204
KEGG_AMYOTROPHIC_LATERAL_SCLEROSIS_ALS	1.48916	0.567199	3.90973	0.418761
KEGG_HUNTINGTONS_DISEASE	1.92047	0.920962	4.00472	0.0817931
KEGG_PRION_DISEASES	0.676558	0.337911	1.35459	0.269972
KEGG_VIBRIO_CHOLERAE_INFECTION	3.04035	1.49852	6.16857	0.00206667
KEGG_EPITHELIAL_CELL_SIGNALING_IN_HELICOBACTER_PYLORI_INFECTION	1.89894	0.961056	3.75209	0.064944
KEGG_LEISHMANIA_INFECTION	1.00036	0.619291	1.61592	0.998813
KEGG_PATHWAYS_IN_CANCER	1.32383	0.642184	2.72899	0.447227
KEGG_COLORECTAL_CANCER	1.40209	0.772913	2.54345	0.266033
KEGG_RENAL_CELL_CARCINOMA	1.5616	0.87331	2.79234	0.132808
KEGG_PANCREATIC_CANCER	1.37955	0.767795	2.47874	0.281843
KEGG_ENDOMETRIAL_CANCER	1.17309	0.656563	2.09599	0.5898
KEGG_GLIOMA	1.20663	0.597657	2.43611	0.600281
KEGG_PROSTATE_CANCER	1.14808	0.595652	2.21287	0.679995
KEGG_THYROID_CANCER	1.77701	0.946365	3.33672	0.0736989
KEGG_BASAL_CELL_CARCINOMA	1.03694	0.467301	2.30096	0.928928
KEGG_MELANOMA	0.831739	0.373415	1.8526	0.652058
KEGG_BLADDER_CANCER	1.88546	0.940801	3.77863	0.0737891
KEGG_CHRONIC_MYELOID_LEUKEMIA	1.41869	0.797854	2.52262	0.233673
KEGG_ACUTE_MYELOID_LEUKEMIA	1.18002	0.640946	2.17247	0.595035
KEGG_SMALL_CELL_LUNG_CANCER	1.43532	0.769953	2.67567	0.255426
KEGG_NON_SMALL_CELL_LUNG_CANCER	1.53865	0.787743	3.00534	0.20713
KEGG_ASTHMA	0.676991	0.435715	1.05187	0.0827352
KEGG_AUTOIMMUNE_THYROID_DISEASE	0.659888	0.408984	1.06472	0.0885603
KEGG_ALLOGRAFT_REJECTION	0.731467	0.496821	1.07694	0.1131
KEGG_GRAFT_VERSUS_HOST_DISEASE	0.740921	0.499077	1.09996	0.136914
KEGG_VIRAL_MYOCARDITIS	0.709398	0.406882	1.23683	0.226072

## Sheet: LIRI-JP
Table S8B Univariate Cox analysis of KEGG pathways for OS in LIRI-JP
KEGG pathways	HR	HR.95L	HR.95H	pvalue
KEGG_N_GLYCAN_BIOSYNTHESIS	7.6173	2.2	26.3742	0.0013542
KEGG_OTHER_GLYCAN_DEGRADATION	1.25959	0.472588	3.35717	0.644504
KEGG_O_GLYCAN_BIOSYNTHESIS	4.31737	1.10698	16.8384	0.035176
KEGG_GLYCOSAMINOGLYCAN_DEGRADATION	1.65475	0.495084	5.5308	0.413321
KEGG_GLYCOSAMINOGLYCAN_BIOSYNTHESIS_KERATAN_SULFATE	7.6718	2.39834	24.5405	0.000593683
KEGG_GLYCEROLIPID_METABOLISM	0.1078	0.0217016	0.535479	0.00645555
KEGG_GLYCOSYLPHOSPHATIDYLINOSITOL_GPI_ANCHOR_BIOSYNTHESIS	4.09166	1.37973	12.134	0.0110747
KEGG_GLYCEROPHOSPHOLIPID_METABOLISM	1.42191	0.186807	10.8231	0.733925
KEGG_ETHER_LIPID_METABOLISM	0.275865	0.0392979	1.93653	0.19523
KEGG_ARACHIDONIC_ACID_METABOLISM	0.197652	0.0646647	0.604137	0.00445504
KEGG_LINOLEIC_ACID_METABOLISM	0.23299	0.101746	0.533527	0.000568597
KEGG_ALPHA_LINOLENIC_ACID_METABOLISM	0.23583	0.0795527	0.699107	0.00917224
KEGG_SPHINGOLIPID_METABOLISM	1.41142	0.310691	6.41188	0.655428
KEGG_GLYCOSPHINGOLIPID_BIOSYNTHESIS_LACTO_AND_NEOLACTO_SERIES	3.61657	0.930058	14.0632	0.0635509
KEGG_GLYCOSPHINGOLIPID_BIOSYNTHESIS_GLOBO_SERIES	3.48791	1.20719	10.0776	0.0210107
KEGG_GLYCOSPHINGOLIPID_BIOSYNTHESIS_GANGLIO_SERIES	1.64012	0.576152	4.66892	0.353952
KEGG_RIBOFLAVIN_METABOLISM	3.37733	1.17349	9.72004	0.0240342
KEGG_NICOTINATE_AND_NICOTINAMIDE_METABOLISM	0.78314	0.236341	2.59501	0.689225
KEGG_PANTOTHENATE_AND_COA_BIOSYNTHESIS	0.648572	0.23428	1.79548	0.40461
KEGG_AMINOACYL_TRNA_BIOSYNTHESIS	2.24436	0.960351	5.24511	0.0619639
KEGG_BASAL_TRANSCRIPTION_FACTORS	3.60458	1.08463	11.9792	0.0363898
KEGG_NON_HOMOLOGOUS_END_JOINING	5.02228	1.8554	13.5945	0.0014904
KEGG_SNARE_INTERACTIONS_IN_VESICULAR_TRANSPORT	0.945821	0.258711	3.45782	0.932884
KEGG_LYSOSOME	2.16453	0.597832	7.83698	0.239473
KEGG_CARDIAC_MUSCLE_CONTRACTION	3.53593	1.00412	12.4516	0.0492569
KEGG_RENIN_ANGIOTENSIN_SYSTEM	0.633316	0.227533	1.76277	0.381802
KEGG_CIRCADIAN_RHYTHM_MAMMAL	0.46274	0.181157	1.182	0.107288
KEGG_TASTE_TRANSDUCTION	0.441839	0.0739784	2.63891	0.37037
KEGG_PROXIMAL_TUBULE_BICARBONATE_RECLAMATION	0.498521	0.179286	1.38618	0.182166
KEGG_PATHOGENIC_ESCHERICHIA_COLI_INFECTION	4.45281	1.43264	13.8398	0.0098418
KEGG_SYSTEMIC_LUPUS_ERYTHEMATOSUS	0.33333	0.146726	0.757256	0.00868765
KEGG_PRIMARY_IMMUNODEFICIENCY	0.439075	0.188226	1.02423	0.0568367
KEGG_HYPERTROPHIC_CARDIOMYOPATHY_HCM	0.374407	0.0943316	1.48604	0.162482
KEGG_ARRHYTHMOGENIC_RIGHT_VENTRICULAR_CARDIOMYOPATHY_ARVC	0.692715	0.173258	2.7696	0.603598
KEGG_DILATED_CARDIOMYOPATHY	0.295101	0.0819143	1.06312	0.0619908
KEGG_GLYCOLYSIS_GLUCONEOGENESIS	0.639158	0.22925	1.782	0.392215
KEGG_CITRATE_CYCLE_TCA_CYCLE	1.1525	0.549626	2.41667	0.707139
KEGG_PENTOSE_PHOSPHATE_PATHWAY	9.45655	2.68062	33.3604	0.000477659
KEGG_PENTOSE_AND_GLUCURONATE_INTERCONVERSIONS	0.668372	0.369144	1.21015	0.18345
KEGG_FRUCTOSE_AND_MANNOSE_METABOLISM	4.33739	0.976826	19.2593	0.0537139
KEGG_GALACTOSE_METABOLISM	1.46459	0.359365	5.96892	0.59452
KEGG_ASCORBATE_AND_ALDARATE_METABOLISM	0.656528	0.378939	1.13746	0.13345
KEGG_FATTY_ACID_METABOLISM	0.377916	0.197776	0.722134	0.00322625
KEGG_STEROID_BIOSYNTHESIS	1.73014	0.872899	3.42925	0.116292
KEGG_PRIMARY_BILE_ACID_BIOSYNTHESIS	0.434786	0.242391	0.77989	0.00520811
KEGG_STEROID_HORMONE_BIOSYNTHESIS	0.595257	0.296375	1.19555	0.144844
KEGG_OXIDATIVE_PHOSPHORYLATION	2.75525	1.13174	6.7077	0.0255762
KEGG_PURINE_METABOLISM	955.85	103.476	8829.55	1.44953e-09
KEGG_PYRIMIDINE_METABOLISM	85.2245	18.6965	388.481	9.27467e-09
KEGG_ALANINE_ASPARTATE_AND_GLUTAMATE_METABOLISM	0.501355	0.219267	1.14635	0.101782
KEGG_GLYCINE_SERINE_AND_THREONINE_METABOLISM	0.545065	0.28367	1.04733	0.0685784
KEGG_CYSTEINE_AND_METHIONINE_METABOLISM	1.48746	0.439827	5.0305	0.523004
KEGG_VALINE_LEUCINE_AND_ISOLEUCINE_DEGRADATION	0.519374	0.271896	0.992106	0.0472597
KEGG_LYSINE_DEGRADATION	0.453605	0.178437	1.15311	0.0967748
KEGG_ARGININE_AND_PROLINE_METABOLISM	0.556255	0.235657	1.31301	0.180733
KEGG_HISTIDINE_METABOLISM	0.331013	0.142285	0.770071	0.0102741
KEGG_TYROSINE_METABOLISM	0.349039	0.148438	0.820737	0.0158298
KEGG_PHENYLALANINE_METABOLISM	0.465371	0.214902	1.00776	0.052337
KEGG_TRYPTOPHAN_METABOLISM	0.387478	0.189518	0.792218	0.00936903
KEGG_BETA_ALANINE_METABOLISM	0.349939	0.171207	0.71526	0.00399299
KEGG_TAURINE_AND_HYPOTAURINE_METABOLISM	0.161449	0.0511389	0.509708	0.00187794
KEGG_SELENOAMINO_ACID_METABOLISM	2.97196	0.885892	9.97024	0.0777706
KEGG_GLUTATHIONE_METABOLISM	1.4653	0.468188	4.58597	0.511621
KEGG_STARCH_AND_SUCROSE_METABOLISM	0.481716	0.2213	1.04858	0.0657039
KEGG_AMINO_SUGAR_AND_NUCLEOTIDE_SUGAR_METABOLISM	6.24252	1.51432	25.7336	0.0112711
KEGG_GLYCOSAMINOGLYCAN_BIOSYNTHESIS_CHONDROITIN_SULFATE	0.794128	0.293746	2.14689	0.649629
KEGG_GLYCOSAMINOGLYCAN_BIOSYNTHESIS_HEPARAN_SULFATE	1.25816	0.283946	5.57486	0.762377
KEGG_INOSITOL_PHOSPHATE_METABOLISM	0.600325	0.168119	2.14367	0.431999
KEGG_PYRUVATE_METABOLISM	0.5043	0.208617	1.21907	0.128483
KEGG_GLYOXYLATE_AND_DICARBOXYLATE_METABOLISM	1.03345	0.441215	2.42063	0.939602
KEGG_PROPANOATE_METABOLISM	0.481531	0.238247	0.973241	0.0417991
KEGG_BUTANOATE_METABOLISM	0.412222	0.203684	0.834267	0.0137501
KEGG_ONE_CARBON_POOL_BY_FOLATE	1.91446	0.632916	5.79093	0.250147
KEGG_FOLATE_BIOSYNTHESIS	0.881392	0.419665	1.85112	0.738778
KEGG_RETINOL_METABOLISM	0.474837	0.247781	0.909955	0.0248128
KEGG_PORPHYRIN_AND_CHLOROPHYLL_METABOLISM	0.734697	0.353764	1.52582	0.40835
KEGG_TERPENOID_BACKBONE_BIOSYNTHESIS	1.71283	0.787739	3.7243	0.174488
KEGG_NITROGEN_METABOLISM	0.390404	0.154703	0.985211	0.0464247
KEGG_SULFUR_METABOLISM	1.23518	0.439221	3.47357	0.688881
KEGG_METABOLISM_OF_XENOBIOTICS_BY_CYTOCHROME_P450	0.512192	0.26133	1.00386	0.0513277
KEGG_DRUG_METABOLISM_CYTOCHROME_P450	0.431715	0.2222	0.838782	0.0131843
KEGG_DRUG_METABOLISM_OTHER_ENZYMES	0.542217	0.254435	1.1555	0.112838
KEGG_BIOSYNTHESIS_OF_UNSATURATED_FATTY_ACIDS	0.856973	0.37642	1.95102	0.713088
KEGG_ABC_TRANSPORTERS	0.18244	0.0590404	0.563755	0.00312015
KEGG_RIBOSOME	2.64286	1.47108	4.74799	0.00114879
KEGG_RNA_DEGRADATION	13.9623	4.01771	48.5219	3.35139e-05
KEGG_RNA_POLYMERASE	9.29972	3.2636	26.4998	2.99465e-05
KEGG_DNA_REPLICATION	11.4841	4.78896	27.5394	4.50445e-08
KEGG_SPLICEOSOME	10.7742	3.87889	29.9267	5.10037e-06
KEGG_PROTEASOME	3.29291	1.49411	7.25736	0.00311826
KEGG_PROTEIN_EXPORT	4.81596	1.77927	13.0354	0.00197385
KEGG_PPAR_SIGNALING_PATHWAY	0.345684	0.14555	0.821008	0.0160913
KEGG_BASE_EXCISION_REPAIR	21.2178	6.3106	71.3392	7.90899e-07
KEGG_NUCLEOTIDE_EXCISION_REPAIR	12.599	3.79354	41.8433	3.51764e-05
KEGG_MISMATCH_REPAIR	11.0515	4.15261	29.4118	1.50333e-06
KEGG_HOMOLOGOUS_RECOMBINATION	11.5743	4.41728	30.3272	6.27396e-07
KEGG_MAPK_SIGNALING_PATHWAY	0.222307	0.0308024	1.60443	0.135924
KEGG_ERBB_SIGNALING_PATHWAY	1.86644	0.431893	8.06589	0.403346
KEGG_CALCIUM_SIGNALING_PATHWAY	0.0202838	0.00287012	0.14335	9.34881e-05
KEGG_CYTOKINE_CYTOKINE_RECEPTOR_INTERACTION	0.20837	0.0653193	0.664705	0.00804892
KEGG_CHEMOKINE_SIGNALING_PATHWAY	0.301339	0.0814379	1.11502	0.0723563
KEGG_PHOSPHATIDYLINOSITOL_SIGNALING_SYSTEM	0.434025	0.119787	1.57261	0.203834
KEGG_NEUROACTIVE_LIGAND_RECEPTOR_INTERACTION	0.0851339	0.015931	0.454949	0.00396424
KEGG_CELL_CYCLE	23.5469	7.05594	78.5804	2.78195e-07
KEGG_OOCYTE_MEIOSIS	39.9911	7.77044	205.817	1.02039e-05
KEGG_P53_SIGNALING_PATHWAY	7.39048	1.3459	40.5819	0.021345
KEGG_UBIQUITIN_MEDIATED_PROTEOLYSIS	6.29022	1.66493	23.7649	0.00669482
KEGG_REGULATION_OF_AUTOPHAGY	1.09364	0.238534	5.0142	0.908274
KEGG_ENDOCYTOSIS	2.00688	0.381958	10.5445	0.410543
KEGG_PEROXISOME	0.481192	0.215358	1.07516	0.0745405
KEGG_MTOR_SIGNALING_PATHWAY	3.19472	0.732604	13.9315	0.122141
KEGG_APOPTOSIS	0.297352	0.0717565	1.2322	0.0945052
KEGG_VASCULAR_SMOOTH_MUSCLE_CONTRACTION	0.152383	0.0268492	0.864858	0.033681
KEGG_WNT_SIGNALING_PATHWAY	0.858565	0.137493	5.36124	0.870382
KEGG_DORSO_VENTRAL_AXIS_FORMATION	0.497984	0.157494	1.57459	0.235224
KEGG_NOTCH_SIGNALING_PATHWAY	0.381766	0.104645	1.39276	0.144765
KEGG_HEDGEHOG_SIGNALING_PATHWAY	0.132173	0.0241018	0.724832	0.0197748
KEGG_TGF_BETA_SIGNALING_PATHWAY	0.700642	0.154036	3.18691	0.645298
KEGG_AXON_GUIDANCE	0.346788	0.0666294	1.80494	0.208276
KEGG_VEGF_SIGNALING_PATHWAY	0.519121	0.0816827	3.29919	0.487148
KEGG_FOCAL_ADHESION	0.447227	0.114228	1.75099	0.247869
KEGG_ECM_RECEPTOR_INTERACTION	0.379495	0.110492	1.30341	0.123792
KEGG_CELL_ADHESION_MOLECULES_CAMS	0.168455	0.0548942	0.516943	0.00184988
KEGG_ADHERENS_JUNCTION	1.63635	0.427866	6.25811	0.4718
KEGG_TIGHT_JUNCTION	1.11336	0.164096	7.55393	0.912472
KEGG_GAP_JUNCTION	1.49411	0.307713	7.25469	0.618446
KEGG_COMPLEMENT_AND_COAGULATION_CASCADES	0.270585	0.13532	0.541063	0.000217947
KEGG_ANTIGEN_PROCESSING_AND_PRESENTATION	0.46182	0.17889	1.19222	0.110352
KEGG_TOLL_LIKE_RECEPTOR_SIGNALING_PATHWAY	0.215255	0.052604	0.880817	0.0326395
KEGG_NOD_LIKE_RECEPTOR_SIGNALING_PATHWAY	0.606221	0.188028	1.95452	0.402043
KEGG_RIG_I_LIKE_RECEPTOR_SIGNALING_PATHWAY	0.112929	0.0204532	0.623516	0.0123552
KEGG_CYTOSOLIC_DNA_SENSING_PATHWAY	0.344786	0.0798421	1.48891	0.153676
KEGG_JAK_STAT_SIGNALING_PATHWAY	0.079824	0.0171086	0.372436	0.00129628
KEGG_HEMATOPOIETIC_CELL_LINEAGE	0.311816	0.110427	0.880488	0.0277871
KEGG_NATURAL_KILLER_CELL_MEDIATED_CYTOTOXICITY	0.279049	0.0834669	0.932924	0.0381988
KEGG_T_CELL_RECEPTOR_SIGNALING_PATHWAY	0.392481	0.125858	1.22393	0.107018
KEGG_B_CELL_RECEPTOR_SIGNALING_PATHWAY	0.293255	0.0903274	0.952076	0.0411812
KEGG_FC_EPSILON_RI_SIGNALING_PATHWAY	0.342076	0.0719972	1.62528	0.177294
KEGG_FC_GAMMA_R_MEDIATED_PHAGOCYTOSIS	1.30765	0.430399	3.97295	0.636154
KEGG_LEUKOCYTE_TRANSENDOTHELIAL_MIGRATION	0.282581	0.0697189	1.14534	0.0767412
KEGG_INTESTINAL_IMMUNE_NETWORK_FOR_IGA_PRODUCTION	0.324283	0.145671	0.721897	0.00581431
KEGG_LONG_TERM_POTENTIATION	0.87751	0.171323	4.49456	0.875419
KEGG_NEUROTROPHIN_SIGNALING_PATHWAY	1.4158	0.377654	5.30771	0.606074
KEGG_LONG_TERM_DEPRESSION	0.702544	0.0773385	6.38193	0.753827
KEGG_OLFACTORY_TRANSDUCTION	0.503769	0.164421	1.5435	0.230071
KEGG_REGULATION_OF_ACTIN_CYTOSKELETON	1.25814	0.271222	5.8362	0.769285
KEGG_INSULIN_SIGNALING_PATHWAY	1.2872	0.163422	10.1387	0.810519
KEGG_GNRH_SIGNALING_PATHWAY	0.626565	0.107223	3.66137	0.60373
KEGG_PROGESTERONE_MEDIATED_OOCYTE_MATURATION	12.8979	2.91855	56.9997	0.00074436
KEGG_MELANOGENESIS	0.484369	0.0732972	3.20085	0.451804
KEGG_ADIPOCYTOKINE_SIGNALING_PATHWAY	0.112653	0.0235685	0.538458	0.00622781
KEGG_TYPE_II_DIABETES_MELLITUS	0.140221	0.024061	0.817175	0.0289277
KEGG_TYPE_I_DIABETES_MELLITUS	0.436091	0.206563	0.920665	0.0294977
KEGG_MATURITY_ONSET_DIABETES_OF_THE_YOUNG	0.490809	0.19189	1.25537	0.137461
KEGG_ALDOSTERONE_REGULATED_SODIUM_REABSORPTION	0.131537	0.0214314	0.807317	0.0284394
KEGG_VASOPRESSIN_REGULATED_WATER_REABSORPTION	3.06347	0.88312	10.6269	0.0777136
KEGG_ALZHEIMERS_DISEASE	3.59486	0.963947	13.4063	0.0567429
KEGG_PARKINSONS_DISEASE	2.66755	1.06887	6.65733	0.0354922
KEGG_AMYOTROPHIC_LATERAL_SCLEROSIS_ALS	0.24374	0.0366235	1.62216	0.144365
KEGG_HUNTINGTONS_DISEASE	8.19651	2.13235	31.5064	0.0021972
KEGG_PRION_DISEASES	0.234679	0.0693367	0.794301	0.0197975
KEGG_VIBRIO_CHOLERAE_INFECTION	8.93816	2.25575	35.4165	0.00182104
KEGG_EPITHELIAL_CELL_SIGNALING_IN_HELICOBACTER_PYLORI_INFECTION	2.63626	0.671764	10.3457	0.164642
KEGG_LEISHMANIA_INFECTION	0.538934	0.227176	1.27853	0.160767
KEGG_PATHWAYS_IN_CANCER	0.970997	0.158844	5.9356	0.974581
KEGG_COLORECTAL_CANCER	2.21757	0.571467	8.60528	0.249662
KEGG_RENAL_CELL_CARCINOMA	1.7396	0.579053	5.22615	0.323897
KEGG_PANCREATIC_CANCER	2.17475	0.632348	7.47929	0.217671
KEGG_ENDOMETRIAL_CANCER	1.14837	0.279105	4.72492	0.847986
KEGG_GLIOMA	1.1958	0.256524	5.5743	0.819896
KEGG_PROSTATE_CANCER	0.945512	0.206439	4.33054	0.94247
KEGG_THYROID_CANCER	9.90782	1.97041	49.8197	0.00538534
KEGG_BASAL_CELL_CARCINOMA	0.0810529	0.0142003	0.462637	0.0046942
KEGG_MELANOMA	0.500519	0.0727927	3.44154	0.481699
KEGG_BLADDER_CANCER	10.3472	2.30905	46.3674	0.0022619
KEGG_CHRONIC_MYELOID_LEUKEMIA	2.49383	0.72832	8.53911	0.145627
KEGG_ACUTE_MYELOID_LEUKEMIA	1.04813	0.269058	4.08302	0.945984
KEGG_SMALL_CELL_LUNG_CANCER	1.35611	0.31804	5.7824	0.68056
KEGG_NON_SMALL_CELL_LUNG_CANCER	2.82914	0.657864	12.1667	0.162318
KEGG_ASTHMA	0.345034	0.157627	0.755254	0.00776252
KEGG_AUTOIMMUNE_THYROID_DISEASE	0.319111	0.13943	0.730341	0.00685441
KEGG_ALLOGRAFT_REJECTION	0.395332	0.195996	0.7974	0.00953099
KEGG_GRAFT_VERSUS_HOST_DISEASE	0.393491	0.191813	0.807219	0.0109549
KEGG_VIRAL_MYOCARDITIS	0.268709	0.0918897	0.785775	0.0163809

## Sheet: Venn
Table S8C Prognosis-related pathways
TCGA risk	ICGC risk	TCGA protective	ICGC protective	Overlap risk	Overlap protective
RNA POLYMERASE	CARDIAC MUSCLE CONTRACTION	LIMONENE AND PINENE DEGRADATION	VALINE LEUCINE AND ISOLEUCINE DEGRADATION	AMINO_SUGAR_AND_NUCLEOTIDE_SUGAR_METABOLISM	PROPANOATE_METABOLISM
PYRIMIDINE METABOLISM	BASAL TRANSCRIPTION FACTORS	PEROXISOME	NITROGEN METABOLISM	BASAL_TRANSCRIPTION_FACTORS	BETA_ALANINE_METABOLISM
PURINE METABOLISM	PARKINSONS DISEASE	CELL ADHESION MOLECULES CAMS	PROPANOATE METABOLISM	BASE_EXCISION_REPAIR	PRIMARY_BILE_ACID_BIOSYNTHESIS
CELL CYCLE	O GLYCAN BIOSYNTHESIS	PROPANOATE METABOLISM	B CELL RECEPTOR SIGNALING PATHWAY	CELL_CYCLE	VALINE_LEUCINE_AND_ISOLEUCINE_DEGRADATION
DNA REPLICATION	OXIDATIVE PHOSPHORYLATION	BETA ALANINE METABOLISM	NATURAL KILLER CELL MEDIATED CYTOTOXICITY	DNA_REPLICATION	BUTANOATE_METABOLISM
SPLICEOSOME	RIBOFLAVIN METABOLISM	ARGININE AND PROLINE METABOLISM	VASCULAR SMOOTH MUSCLE CONTRACTION	GLYCOSAMINOGLYCAN_BIOSYNTHESIS_KERATAN_SULFATE	CELL_ADHESION_MOLECULES_CAMS
HOMOLOGOUS RECOMBINATION	P53 SIGNALING PATHWAY	METABOLISM OF XENOBIOTICS BY CYTOCHROME P450	TOLL LIKE RECEPTOR SIGNALING PATHWAY	GLYCOSPHINGOLIPID_BIOSYNTHESIS_GLOBO_SERIES	RETINOL_METABOLISM
RNA DEGRADATION	GLYCOSPHINGOLIPID BIOSYNTHESIS GLOBO SERIES	RENIN ANGIOTENSIN SYSTEM	TYPE I DIABETES MELLITUS	GLYCOSYLPHOSPHATIDYLINOSITOL_GPI_ANCHOR_BIOSYNTHESIS	FATTY_ACID_METABOLISM
BASE EXCISION REPAIR	AMINO SUGAR AND NUCLEOTIDE SUGAR METABOLISM	ARACHIDONIC ACID METABOLISM	TYPE II DIABETES MELLITUS	HOMOLOGOUS_RECOMBINATION	TRYPTOPHAN_METABOLISM
RIBOFLAVIN METABOLISM	GLYCOSYLPHOSPHATIDYLINOSITOL GPI ANCHOR BIOSYNTHESIS	BUTANOATE METABOLISM	ALDOSTERONE REGULATED SODIUM REABSORPTION	MISMATCH_REPAIR	PPAR_SIGNALING_PATHWAY
VIBRIO CHOLERAE INFECTION	PATHOGENIC ESCHERICHIA COLI INFECTION	TAURINE AND HYPOTAURINE METABOLISM	HEMATOPOIETIC CELL LINEAGE	N_GLYCAN_BIOSYNTHESIS	COMPLEMENT_AND_COAGULATION_CASCADES
LYSOSOME	UBIQUITIN MEDIATED PROTEOLYSIS	NEUROACTIVE LIGAND RECEPTOR INTERACTION	RETINOL METABOLISM	NON_HOMOLOGOUS_END_JOINING	DRUG_METABOLISM_CYTOCHROME_P450
PROTEASOME	THYROID CANCER	PHENYLALANINE METABOLISM	PRION DISEASES	NUCLEOTIDE_EXCISION_REPAIR	TAURINE_AND_HYPOTAURINE_METABOLISM
NUCLEOTIDE EXCISION REPAIR	PROTEASOME	RETINOL METABOLISM	HEDGEHOG SIGNALING PATHWAY	OOCYTE_MEIOSIS	NITROGEN_METABOLISM
AMINOACYL TRNA BIOSYNTHESIS	BLADDER CANCER	PPAR SIGNALING PATHWAY	VIRAL MYOCARDITIS	PATHOGENIC_ESCHERICHIA_COLI_INFECTION	HISTIDINE_METABOLISM
OOCYTE MEIOSIS	HUNTINGTONS DISEASE	ALANINE ASPARTATE AND GLUTAMATE METABOLISM	PPAR SIGNALING PATHWAY	PENTOSE_PHOSPHATE_PATHWAY	TYROSINE_METABOLISM
PROTEIN EXPORT	PROTEIN EXPORT	PRIMARY BILE ACID BIOSYNTHESIS	TYROSINE METABOLISM	PROGESTERONE_MEDIATED_OOCYTE_MATURATION	ARACHIDONIC_ACID_METABOLISM
FRUCTOSE AND MANNOSE METABOLISM	VIBRIO CHOLERAE INFECTION	TRYPTOPHAN METABOLISM	BUTANOATE METABOLISM	PROTEASOME	NEUROACTIVE_LIGAND_RECEPTOR_INTERACTION
N GLYCAN BIOSYNTHESIS	NON HOMOLOGOUS END JOINING	PROXIMAL TUBULE BICARBONATE RECLAMATION	DRUG METABOLISM CYTOCHROME P450	PROTEIN_EXPORT	LINOLEIC_ACID_METABOLISM
AMINO SUGAR AND NUCLEOTIDE SUGAR METABOLISM	N GLYCAN BIOSYNTHESIS	NITROGEN METABOLISM	RIG I LIKE RECEPTOR SIGNALING PATHWAY	PURINE_METABOLISM	ALPHA_LINOLENIC_ACID_METABOLISM
NON HOMOLOGOUS END JOINING	RIBOSOME	VALINE LEUCINE AND ISOLEUCINE DEGRADATION	GRAFT VERSUS HOST DISEASE	PYRIMIDINE_METABOLISM
PATHOGENIC ESCHERICHIA COLI INFECTION	PROGESTERONE MEDIATED OOCYTE MATURATION	DRUG METABOLISM CYTOCHROME P450	HISTIDINE METABOLISM	RIBOFLAVIN_METABOLISM
PENTOSE PHOSPHATE PATHWAY	GLYCOSAMINOGLYCAN BIOSYNTHESIS KERATAN SULFATE	TYROSINE METABOLISM	ALLOGRAFT REJECTION	RNA_DEGRADATION
PROGESTERONE MEDIATED OOCYTE MATURATION	PENTOSE PHOSPHATE PATHWAY	GLYCINE SERINE AND THREONINE METABOLISM	TRYPTOPHAN METABOLISM	RNA_POLYMERASE
GLYCOSAMINOGLYCAN BIOSYNTHESIS KERATAN SULFATE	NUCLEOTIDE EXCISION REPAIR	FATTY ACID METABOLISM	ALPHA LINOLENIC ACID METABOLISM	SPLICEOSOME
MISMATCH REPAIR	RNA DEGRADATION	HISTIDINE METABOLISM	SYSTEMIC LUPUS ERYTHEMATOSUS	UBIQUITIN_MEDIATED_PROTEOLYSIS
GLYCOSYLPHOSPHATIDYLINOSITOL GPI ANCHOR BIOSYNTHESIS	RNA POLYMERASE	COMPLEMENT AND COAGULATION CASCADES	CYTOKINE CYTOKINE RECEPTOR INTERACTION	VIBRIO_CHOLERAE_INFECTION
UBIQUITIN MEDIATED PROTEOLYSIS	OOCYTE MEIOSIS	ALPHA LINOLENIC ACID METABOLISM	ASTHMA
GLYCOSPHINGOLIPID BIOSYNTHESIS GLOBO SERIES	SPLICEOSOME	LINOLEIC ACID METABOLISM	AUTOIMMUNE THYROID DISEASE
BASAL TRANSCRIPTION FACTORS	MISMATCH REPAIR		GLYCEROLIPID METABOLISM
VALINE LEUCINE AND ISOLEUCINE BIOSYNTHESIS	BASE EXCISION REPAIR		ADIPOCYTOKINE SIGNALING PATHWAY
	HOMOLOGOUS RECOMBINATION		INTESTINAL IMMUNE NETWORK FOR IGA PRODUCTION
	CELL CYCLE		PRIMARY BILE ACID BIOSYNTHESIS
	DNA REPLICATION		BASAL CELL CARCINOMA
	PYRIMIDINE METABOLISM		ARACHIDONIC ACID METABOLISM
	PURINE METABOLISM		BETA ALANINE METABOLISM
			NEUROACTIVE LIGAND RECEPTOR INTERACTION
			FATTY ACID METABOLISM
			ABC TRANSPORTERS
			TAURINE AND HYPOTAURINE METABOLISM
			CELL ADHESION MOLECULES CAMS
			JAK STAT SIGNALING PATHWAY
			LINOLEIC ACID METABOLISM
			COMPLEMENT AND COAGULATION CASCADES
			CALCIUM SIGNALING PATHWAY
